# Supplementary material for: LocoMMotion: a study of real-life current standards of care in triple-class exposed patients with relapsed/refractory multiple myeloma – 2-year follow-up (final analysis)
Source: PubMed Central journal article supplement (PMC11588650; doi:10.1038/s41375-024-02404-6), 2024-09-25
Supplement: 41375_2024_2404_MOESM1_ESM.pdf [file 41375_2024_2404_MOESM1_ESM.pdf]

## LocoMMotion Final Analysis

**Table S1:** Ethics committees/Institutional Review Boards in LocoMMotion

| <b>Country</b> | <b>Ethics Committee/ Institutional Review Board address</b>                                     | <b>Approval date</b> | <b>Ref #</b>                |
|----------------|-------------------------------------------------------------------------------------------------|----------------------|-----------------------------|
| US             | The James/ A054 Starling Loving Hall<br>320 W. 10th Ave, Columbus, OH 43210                     | 15 Nov 2019          | OSU-19288                   |
| US             | Columbia Research<br>615 West 131st St. 3rd floor, New York, NY 10027                           | 21 Nov 2019          | IRB-AAAS7369 or<br>7571412  |
| US             | Washington University in St. Louis<br>660 South Euclid Ave. Campus Box 8089, St. Louis MO 63110 | 19 Dec 2019          | 201912009                   |
| US             | Sterling IRB<br>6300 Powers Ferry Road Suite 600-351, Atlanta GA 30339                          | 10 Oct 2019          | IRB ID 7513-<br>PDEisenberg |
| US             | Sterling IRB<br>6300 Powers Ferry Road Suite 600-351, Atlanta GA 30339                          | 29 Oct 2019          | IRB ID 7513-<br>Amazumder   |
| US             | Sterling IRB<br>6300 Powers Ferry Road Suite 600-351, Atlanta GA 30339                          | 19 Nov 2019          | IRB ID 7513-<br>KSJahangir  |
| US             | Sterling IRB<br>6300 Powers Ferry Road Suite 600-351, Atlanta GA 30339                          | 21 Oct 2019          | IRB ID 7513-<br>MEBednar    |
| US             | Sterling IRB<br>6300 Powers Ferry Road Suite 600-351, Atlanta GA 30339                          | 13 Nov 2019          | IRB ID 7513-Cchen           |

## LocoMMotion Final Analysis

|         |                                                                                                                                                                     |             |                             |
|---------|---------------------------------------------------------------------------------------------------------------------------------------------------------------------|-------------|-----------------------------|
| US      | Sterling IRB<br>6300 Powers Ferry Road Suite 600-351, Atlanta GA 30339                                                                                              | 3 Dec 2019  | IRB ID 7513-<br>DHuang      |
| US      | Sterling IRB<br>6300 Powers Ferry Road Suite 600-351, Atlanta GA 30339                                                                                              | 30 Sep 2019 | IRB ID 7513-Zmalik          |
| US      | Sterling IRB<br>6300 Powers Ferry Road Suite 600-351, Atlanta GA 30339                                                                                              | 30 Oct 2019 | IRB ID 7513-<br>Lshunyakov  |
| US      | Sterling IRB<br>6300 Powers Ferry Road Suite 600-351, Atlanta GA 30339                                                                                              | 21 Jan 2020 | IRB ID 7513-<br>Hterebolo   |
| US      | St. Francis Hospital The Heart Center                                                                                                                               | 5 Dec 2019  | IRB #19-34                  |
| US      | Sterling IRB<br>6300 Powers Ferry Road Suite 600-351, Atlanta GA 30339                                                                                              | 4 Dec 2019  | IRB ID 7513-<br>RRCaradonna |
| US      | Sterling IRB<br>6300 Powers Ferry Road Suite 600-351, Atlanta GA 30339                                                                                              | 5 Nov 2019  | IRB ID 7513-Mbajaj          |
| Germany | EC Universiaet Heidelberg, Ethik-Kommission I der Medizinischen<br>Fakultät Heidelberg, Alte Glockengiesserei 11/1, 69115 Heidelberg                                | 16 Aug 2019 | S-549/2019                  |
| Germany | Tuebingen Ethik-Kommission an der Medizinischen Fakultät der Eberhard-Karls-<br>Universität und am Universitätsklinikum Tübingen<br>Gartenstraße 47, 72074 Tübingen | 16 Sep 2019 | 548/2019BO2                 |

## LocoMMotion Final Analysis

|         |                                                                                                                                            |             |                |
|---------|--------------------------------------------------------------------------------------------------------------------------------------------|-------------|----------------|
| Germany | EC medizinische Hochschule Hannover Ethik-Kommission d. Medizinischen Hochschule Hannover<br>Carl-Neuburger-Str. 1, 3623 Hannover          | 20 Sep 2019 | 8672_B0_K_2019 |
| Germany | EC Aertzekammer Hamburg Ethikkommission der Ärztekammer Hamburg; Körperschaft des öffentlichen Rechts<br>Weidestr. 122b, 22083 Hamburg     | 21 Oct 2019 | PV7092         |
| Germany | EC Universitaet Wuerzburg<br>Josef-Schneider-Str. 4, Bau C15, 97080 Wuerzburg                                                              | 17 Jan 2020 | 172/19-me      |
| Germany | EC Universiaet Koeln Geschäftsstelle der ethik-kommission der medizinischen fakultät der universität zu köln<br>Kerpenerstr 62, 50937 Köln | 18 Feb 2020 | 19-1545_1      |
| Spain   | Comité Coordinador de Ética de la Investigación Clínica de Andalucía<br>Avda. de la Innovación, s/n. Edificio Arena 1, 41080 Sevilla       | 2 Oct 2019  | N/A            |
| Spain   | Comité Coordinador de Ética de la Investigación Clínica de Andalucía<br>Avda. de la Innovación, s/n. Edificio Arena 1, 41080 Sevilla       | 7 Oct 2019  | N/A            |
| Spain   | Comité Coordinador de Ética de la Investigación Clínica de Andalucía<br>Avda. de la Innovación, s/n. Edificio Arena 1, 41080 Sevilla       | 7 Oct 2029  | N/A            |
| Spain   | Comité de Ética de la Investigación de Cadiz<br>Avda. Ana de Viya, 21, 11009 Cadiz                                                         | 23 Jul 2020 | N/A            |

## LocoMMotion Final Analysis

|       |                                                                                                                                                                  |             |               |
|-------|------------------------------------------------------------------------------------------------------------------------------------------------------------------|-------------|---------------|
| Spain | Comité Coordinador de Ética de la Investigación Clínica de Andalucía<br>Avda. de la Innovación, s/n. Edificio Arena 1, 41080 Sevilla                             | 30 Jul 2020 | N/A           |
| UK    | Tayside medical science centre<br>Residency block level 3, George Pirie way, Ninewells hospital and medical school, Dundee, DD1 9SY                              | 29 Jul 2019 | DL/19/ES/0088 |
| Italy | Comitato Etico<br>Area 3 ASL Lecce, Via Miglietta 5,73100                                                                                                        | 19 Sep 2019 | CE150036      |
| Italy | Comitato Etico Regione Liguria<br>Largo Rosanna Benzi 10, 16132 Genova                                                                                           | 24 Jan 2020 | CE150193      |
| Italy | Comitato etico dell'IRCCS casa sollievo della sofferenza di s. giovanni rotondo<br>Viale Cappuccini, 71013 SGR                                                   | 17 Jul 2019 | CE150037      |
| Italy | Comitato Etico Indipendente Azienda Ospedaliera Universitaria Policlinico S.<br>Orsola-Malpighi di Bologna<br>Via Albertoni 15, 40138 Bologna                    | 3 Oct 2019  | CE150192      |
| Italy | Comitato Etico della Fondazione Policlinico Universitario Agostino Gemelli<br>IRCCS Università Cattolica del Sacro Cuore<br>Largo Agostino Gemelli 8, 00168 Roma | 22 Jul 2019 | CE150057      |
| Italy | Comitato Etico Catania 1 c/o AOU Policlinico Vittorio Emanuele<br>Via Santa Sofia 78, Catania                                                                    | 30 Oct 2019 | CE150101      |

## LocoMMotion Final Analysis

|       |                                                                                                                       |             |          |
|-------|-----------------------------------------------------------------------------------------------------------------------|-------------|----------|
| Italy | Comitato Etico "La Sapienza" Azienda Policlinico Umberto I<br>Via Del Policlinico 155, 00161 Roma                     | 24 Sep 2019 | CE150031 |
| Italy | Comitato Etico interaziendale aou citta' della salute e della scienza di Torino<br>Corso Bramante 88/90, 10126 Torino | 25 Oct 2019 | CE150115 |
| Italy | CESC della Provincia di Padova<br>Via Giustininani 1, 35128 Padova                                                    | 25 Jun 2020 | CE150028 |
| Italy | Comitato Etico Palermo 2 IRB-EC<br>Viale Strasburgo 233, 90136 Palermo                                                | 14 Oct 2019 | CE150125 |
| Italy | Comitato etico referente per l'area di Pavia<br>Viale Golgi 19, 27100 Pavia                                           | 5 Sep 2019  | CE150183 |
| Italy | Comitato Etico Unico Regionale per la Basilicata IRB-EC<br>Via Potito Petrone 1, 85100 Potenza                        | 16 Oct 2019 | CE150051 |
| Italy | Comitato Etico Interregionale c/o A.O.U. Policlinico Consorziiale<br>Piazza Giulio Cesare 11, 70124 Bari              | 8 Oct 2019  | CE150162 |
| Italy | Comitato Etico IRCCS Istituto Tumori "Giovanni Paolo II"<br>Viale orazio flacco 65, 70124 Bari                        | 23 Apr 2020 | CE150168 |
| Italy | Comitato Etico della Romagna CEROM<br>Via Piero Maroncelli 40, 47014 Meldola                                          | 8 May 2020  | CE150190 |

## LocoMMotion Final Analysis

|                 |                                                                                                                                                                     |             |                                  |
|-----------------|---------------------------------------------------------------------------------------------------------------------------------------------------------------------|-------------|----------------------------------|
| Italy           | Comitato Etico Regione Toscana - Area Vasta Centro c/o Azienda Ospedaliera<br>Universitaria Careggi<br>Largo Brambilla 3, 50134 Firenze                             | 11 May 2020 | CE150071                         |
| Belgium         | Etische Commissie, Onderzoek UZ/KU Leuven<br>Herestraat 49, 3000 Leuven                                                                                             | 13 Sep 2019 | S62984                           |
| The Netherlands | METC van de stichting BEBO<br>Dr. Nassaulaan 10, 9401 HK Assen                                                                                                      | 16 Jul 2019 | 19.084/IH                        |
| Poland          | Komisja Bioetyczna przy, Uniwersytecie Medycznym im. Karola<br>Marcinkowskiego w Poznaniu, Collegium Maius<br>Dział Badań Naukowych; ul. Bukowska 70, 60-812 Poznań | 07 Nov 2019 | 991/19                           |
| France          | CPP EST III, Hopital de Brabois<br>Rue du Morvan, 54511 Vandoeuvre-les-Nancy Cedex                                                                                  | 5 Sep 2019  | Numéro ID RCB:<br>2019-A01716-51 |
| Russia          | Independent Interdisciplinary Committee on Ethics Expertise of Clinical Trials,<br>51 Leningradskiy prospect, 125468 Moscow                                         | 4 Oct 2019  | 15                               |

---
