# Supplementary material for: LocoMMotion: a study of real-life current standards of care in triple-class exposed patients with relapsed/refractory multiple myeloma – 2-year follow-up (final analysis)
Source: PubMed Central journal article supplement (PMC11588650; doi:10.1038/s41375-024-02404-6), 2024-09-25
Supplement: 41375_2024_2404_MOESM2_ESM.pdf [file 41375_2024_2404_MOESM2_ESM.pdf]

**Table S2:** Regimens received by ≥3 patient in any given LOT.<sup>a</sup>

| Regimen, n (%)                                                 | Index LOT<br>(N = 248) | Subsequent LOT   |                 |                 |                  |
|----------------------------------------------------------------|------------------------|------------------|-----------------|-----------------|------------------|
|                                                                |                        | 1st<br>(n = 152) | 2nd<br>(n = 74) | 3rd<br>(n = 42) | ≥4th<br>(n = 17) |
| Cyclophosphamide-Dexamethasone-Pomalidomide                    | 35 (14.1)              | 10 (6.6)         | 1 (1.4)         | 1 (2.4)         | 0 (0)            |
| Carfilzomib-Dexamethasone                                      | 35 (14.1)              | 5 (3.3)          | 4 (5.4)         | 0 (0)           | 0 (0)            |
| Dexamethasone-Pomalidomide                                     | 29 (11.7)              | 4 (2.6)          | 2 (2.7)         | 0 (0)           | 0 (0)            |
| Dexamethasone-Ixazomib-Lenalidomide                            | 14 (5.6)               | 4 (2.6)          | 1 (1.4)         | 1 (2.4)         | 1 (5.9)          |
| Bortezomib-Dexamethasone-Panobinostat                          | 11 (4.4)               | 5 (3.3)          | 0 (0)           | 0 (0)           | 0 (0)            |
| Carfilzomib-Cyclophosphamide-Dexamethasone                     | 7 (2.8)                | 5 (3.3)          | 4 (5.4)         | 0 (0)           | 0 (0)            |
| Bendamustine-Bortezomib-Dexamethasone                          | 7 (2.8)                | 4 (2.6)          | 1 (1.4)         | 0 (0)           | 0 (0)            |
| Dexamethasone-Elotuzumab-Pomalidomide                          | 6 (2.4)                | 4 (2.6)          | 0 (0)           | 0 (0)           | 1 (5.9)          |
| Dexamethasone-Lenalidomide                                     | 6 (2.4)                | 1 (0.7)          | 1 (1.4)         | 0 (0)           | 0 (0)            |
| Bortezomib-Dexamethasone-Doxorubicin                           | 5 (2)                  | 2 (1.3)          | 1 (1.4)         | 0 (0)           | 0 (0)            |
| Carfilzomib-Dexamethasone-Pomalidomide                         | 5 (2)                  | 2 (1.3)          | 1 (1.4)         | 0 (0)           | 0 (0)            |
| Carfilzomib-Dexamethasone-Lenalidomide                         | 5 (2)                  | 0 (0)            | 1 (1.4)         | 0 (0)           | 0 (0)            |
| Belantamab Mafodotin                                           | 4 (1.6)                | 16 (10.5)        | 14 (18.9)       | 8 (19)          | 3 (17.6)         |
| Cyclophosphamide-Dexamethasone                                 | 4 (1.6)                | 2 (1.3)          | 0 (0)           | 1 (2.4)         | 0 (0)            |
| Melphalan                                                      | 4 (1.6)                | 2 (1.3)          | 0 (0)           | 0 (0)           | 0 (0)            |
| Bendamustine-Prednisone                                        | 4 (1.6)                | 1 (0.7)          | 1 (1.4)         | 0 (0)           | 0 (0)            |
| Dexamethasone                                                  | 3 (1.2)                | 3 (2)            | 0 (0)           | 0 (0)           | 1 (5.9)          |
| Bortezomib-Dexamethasone-Venetoclax                            | 3 (1.2)                | 2 (1.3)          | 0 (0)           | 0 (0)           | 0 (0)            |
| Carfilzomib-Daratumumab-Dexamethasone                          | 3 (1.2)                | 1 (0.7)          | 1 (1.4)         | 2 (4.8)         | 0 (0)            |
| Dexamethasone-Melphalan                                        | 3 (1.2)                | 1 (0.7)          | 1 (1.4)         | 0 (0)           | 0 (0)            |
| Bortezomib-Daratumumab-Dexamethasone                           | 3 (1.2)                | 1 (0.7)          | 0 (0)           | 0 (0)           | 1 (5.9)          |
| Dexamethasone-Ixazomib                                         | 3 (1.2)                | 1 (0.7)          | 0 (0)           | 0 (0)           | 0 (0)            |
| Dexamethasone-Elotuzumab-Lenalidomide                          | 3 (1.2)                | 1 (0.7)          | 0 (0)           | 0 (0)           | 0 (0)            |
| Cisplatin-Cyclophosphamide-Dexamethasone-Doxorubicin-Etoposide | 3 (1.2)                | 1 (0.7)          | 0 (0)           | 1 (2.4)         | 0 (0)            |
| Bortezomib-Cyclophosphamide-Dexamethasone                      | 3 (1.2)                | 0 (0)            | 1 (1.4)         | 1 (2.4)         | 1 (5.9)          |
| Bortezomib-Dexamethasone-Lenalidomide                          | 3 (1.2)                | 0 (0)            | 0 (0)           | 0 (0)           | 1 (5.9)          |
| Daratumumab-Dexamethasone-Pomalidomide                         | 3 (1.2)                | 0 (0)            | 0 (0)           | 0 (0)           | 1 (5.9)          |
| Carfilzomib                                                    | 3 (1.2)                | 0 (0)            | 0 (0)           | 0 (0)           | 0 (0)            |
| Dexamethasone-Ixazomib-Pomalidomide                            | 3 (1.2)                | 0 (0)            | 0 (0)           | 0 (0)           | 0 (0)            |
| Carfilzomib-Cisplatin-Cyclophosphamide-Daratumumab-Etoposide   | 3 (1.2)                | 0 (0)            | 0 (0)           | 0 (0)           | 0 (0)            |
| Bendamustine                                                   | 2 (0.8)                | 3 (2)            | 3 (4.1)         | 1 (2.4)         | 0 (0)            |

## LocoMMotion Final Analysis

|                                            |         |         |         |          |         |
|--------------------------------------------|---------|---------|---------|----------|---------|
| Cyclophosphamide-Dexamethasone-Thalidomide | 1 (0.4) | 5 (3.3) | 3 (4.1) | 1 (2.4)  | 0 (0)   |
| Bortezomib-Dexamethasone-Selinexor         | 0 (0)   | 5 (3.3) | 1 (1.4) | 0 (0)    | 0 (0)   |
| Teclistamab                                | 0 (0)   | 4 (2.6) | 2 (2.7) | 0 (0)    | 1 (5.9) |
| Dexamethasone-Selinexor                    | 0 (0)   | 3 (2)   | 1 (1.4) | 1 (2.4)  | 1 (5.9) |
| Dexamethasone-Isatuximab-Pomalidomide      | 0 (0)   | 2 (1.3) | 1 (1.4) | 5 (11.9) | 1 (5.9) |

CAR chimeric antigen receptor, *LOT* line of therapy.

<sup>a</sup>Patients can be counted in  $\geq 1$  regimen.
