# Supplementary material for: LocoMMotion: a study of real-life current standards of care in triple-class exposed patients with relapsed/refractory multiple myeloma – 2-year follow-up (final analysis)
Source: PubMed Central journal article supplement (PMC11588650; doi:10.1038/s41375-024-02404-6), 2024-09-25
Supplement: 41375_2024_2404_MOESM3_ESM.pdf [file 41375_2024_2404_MOESM3_ESM.pdf]

LocoMMotion Final Analysis

**Table S3:** TEAEs reported in ≥5% of patients in index LOT.<sup>a</sup>

| TEAE                                                 | Total (N = 248)  |                  |
|------------------------------------------------------|------------------|------------------|
|                                                      | Any grade, n (%) | Grade 3/4, n (%) |
| Hematologic TEAE                                     | 124 (50.0)       | 101 (40.7)       |
| Thrombocytopenia                                     | 65 (26.2)        | 48 (19.4)        |
| Anemia                                               | 64 (25.8)        | 27 (10.9)        |
| Neutropenia                                          | 50 (20.2)        | 43 (17.3)        |
| Leukopenia                                           | 22 (8.9)         | 15 (6.0)         |
| Lymphopenia                                          | 21 (8.5)         | 19 (7.7)         |
| Non-hematologic TEAEs                                |                  |                  |
| Infections and infestations                          | 82 (33.1)        | 20 (8.1)         |
| Nervous system disorders                             | 60 (24.2)        | 8 (3.2)          |
| Peripheral sensory neuropathy                        | 15 (6.0)         | 2 (0.8)          |
| General disorders and administration site conditions | 101 (40.7)       | 16 (6.5)         |
| Pyrexia                                              | 33 (13.3)        | 6 (2.4)          |
| Fatigue                                              | 31 (12.5)        | 2 (0.8)          |
| Asthenia                                             | 24 (9.7)         | 3 (1.2)          |
| Peripheral edema                                     | 24 (9.7)         | 1 (0.4)          |
| Gastrointestinal disorders                           | 83 (33.5)        | 9 (3.6)          |
| Diarrhea                                             | 40 (16.1)        | 2 (0.8)          |
| Nausea                                               | 25 (10.1)        | 3 (1.2)          |
| Constipation                                         | 14 (5.6)         | 0                |
| Vomiting                                             | 14 (5.6)         | 2 (0.8)          |
| Musculoskeletal and connective tissue disorders      | 67 (27.0)        | 15 (6.0)         |
| Back pain                                            | 26 (10.5)        | 4 (1.6)          |
| Arthralgia                                           | 20 (8.1)         | 3 (1.2)          |
| Bone pain                                            | 13 (5.2)         | 2 (0.8)          |
| Respiratory, thoracic, and mediastinal disorders     | 55 (22.2)        | 14 (5.6)         |
| Dyspnea                                              | 29 (11.7)        | 5 (2.0)          |
| Metabolism and nutrition disorders                   | 37 (14.9)        | 9 (3.6)          |
| Injury, poisoning, and procedural complications      | 30 (12.1)        | 10 (4.0)         |
| Psychiatric disorders                                | 26 (10.5)        | 3 (1.2)          |
| Renal and urinary disorders                          | 25 (10.1)        | 14 (5.6)         |
| Investigations                                       | 24 (9.7)         | 7 (2.8)          |
| Skin and subcutaneous tissue disorders               | 23 (9.3)         | 1 (0.4)          |
| Vascular disorders                                   | 22 (8.9)         | 7 (2.8)          |
| Cardiac disorders                                    | 18 (7.3)         | 8 (3.2)          |
| Eye disorders                                        | 18 (7.3)         | 4 (1.6)          |

LOT line of therapy, TEAE treatment-emergent adverse event.
